# Supplementary material for: Glacier retreat threatens unique microbial communities and biogeochemical functions confined to glacier surfaces
Source: Research Square preprint supplement (doi:10.21203/rs.3.rs-8090681/v1), 2025-11-25
Supplement: Supplementary file 1 [file 284120a658eb6f88c376ddf5.xlsx]

## Sheet: Table S3_fungi-table_FUNGuild1.
Table S4	FUNGild analysis of ITS1 region
OTU ID	Site 1	Site 2	Site 3	Site 4	Site 5	Site 6	Site 7	taxonomy			Taxon	Taxon Level	Trophic Mode	Guild	Growth Morphology	Trait	Confidence Ranking	Notes	Citation/Source
39a4a57fcabd7e53b23c03691c4bd865	0	1494	0	0	2989	0	9292	k__Fungi;p__Ascomycota;c__Leotiomycetes;o__Leotiales;f__Tympanidaceae;g__Claussenomyces;s__Claussenomyces_sp;sh__SH1296139.10FU			Claussenomyces	13	Saprotroph	Undefined Saprotroph-|Wood Saprotroph|	Microfungus	NULL	Probable	Decay wood (Pﾃｵlme et al. 2020)	Esslinger TL. 2014. North Dakota State University ((http://www.ndsu.edu/pubweb/~esslinge/chcklst/chcklst7.htm)); Pﾃｵlme S, et al. 2020. Fungal Diversity 105:1-16 ((https://doi.org/10.1007/s13225-020-00466-2))
ae6c8bcd3aac8dd8274c517f119c3e8a	0	0	0	0	0	851	6101	k__Fungi;p__Ascomycota;c__Sordariomycetes;o__Hypocreales;f__Hypocreales_fam_Incertae_sedis;g__Hypocreales_gen_Incertae_sedis;s__Hypocreales_sp;sh__SH1210371.10FU			Hypocreales	7	Saprotroph	Undefined Saprotroph	Microfungus	NULL	Possible	NULL	Sterkenburg E, et al. 2015. New Phytologist 207:1145-1158 ((https://doi.org/10.1111/nph.13426))
5436405412e45c98b675df3a2aa6f57a	0	0	0	708	1829	5348	5644	k__Fungi;p__Basidiomycota;c__Agaricomycetes;o__Cantharellales;f__Ceratobasidiaceae;g__Ceratobasidium;s__Ceratobasidium_sp;sh__SH1366673.10FU			Ceratobasidium	13	Pathotroph-Saprotroph-Symbiotroph	Ectomycorrhizal-Endomycorrhizal-Orchid Mycorrhizal-|Plant Pathogen|-Plant Saprotroph-Undefined Saprotroph	Corticioid-Microfungus	NULL	Possible	especially of Orchidaceae but also even bryophytes (Cannon & Kirk 2007); As litter_saprotroph (Pﾃｵlme et al. 2020); Best known as plant pathogens, but also saprobic. Species are endomycorrhizal with a wide range of plant roots ; Decay leaf, fruit, seed, roots, soil (Pﾃｵlme et al. 2020)	Cannon PF, Kirk PM. 2007. Fungal Families of the World. CAB International, Cambridge (ISBN: 978-0851998275); Tedersoo L, et al. 2014. Science 346:e1256688 ((https://doi.org/10.1126/science.1256688)); Pﾃｵlme S, et al. 2020. Fungal Diversity 105:1-16 ((https://doi.org/10.1007/s13225-020-00466-2))
b19d1bfe96040abf6940f24b7ac6e0c1	0	0	0	0	0	0	4922	k__Fungi;p__Basidiomycota;c__Agaricomycetes;o__Cantharellales;f__Hydnaceae;g__Sistotrema;s__Sistotrema_sp;sh__SH1184690.10FU			Sistotrema	13	Saprotroph-Symbiotroph	Ectomycorrhizal-|Plant Saprotroph|-Wood Saprotroph	Corticioid	White Rot	Possible	As litter_saprotroph (Pﾃｵlme et al. 2020); Decay leaf, fruit, seed (Pﾃｵlme et al. 2020)	Gilbertson RL, Ryvarden L. 1987-1987. North American Polypores. Fungiflora, Oslo (ISBN: 978-0945345060); Rinaldi AC, et al. 2008. Fungal Diversity 33:1-45 ((http://www.fungaldiversity.org/fdp/sfdp/33-1.pdf)) (as ECM/not ECM); Tedersoo L, et al. 2010. Mycorrhiza 20:217-263 ((https://doi.org/10.1007/s00572-009-0274-x)) (pro parte); Pﾃｵlme S, et al. 2020. Fungal Diversity 105:1-16 ((https://doi.org/…
738980e649f6152b62c121a87639d777	0	0	0	0	0	0	4558	k__Fungi;p__Ascomycota;c__Leotiomycetes;o__Helotiales			-	-	-	-	-	-	-	Unassigned	-
9179745a45cb4aa8f9024c513954f31c	0	0	0	0	0	0	3866	k__Fungi			-	-	-	-	-	-	-	Unassigned	-
a5ffdf8aa53ac2d1caa184050aaee2ea	0	0	0	0	0	0	3557	k__Fungi;p__Ascomycota;c__Orbiliomycetes;o__Orbiliales;f__Orbiliales_fam_Incertae_sedis;g__Orbiliales_gen_Incertae_sedis;s__Orbiliales_sp;sh__SH1413079.10FU			-	-	-	-	-	-	-	Unassigned	-
724fd09bf87a0910ff7e587bf99fb0f9	0	0	0	727	3093	0	2789	k__Fungi;p__Ascomycota;c__Leotiomycetes;o__Helotiales;f__Helotiales_fam_Incertae_sedis;g__Helotiales_gen_Incertae_sedis;s__Helotiales_sp;sh__SH1387980.10FU			-	-	-	-	-	-	-	Unassigned	-
37e58a6ac4cba305ee2959e998ff2eb7	0	0	0	0	0	0	2186	k__Fungi;p__Ascomycota			-	-	-	-	-	-	-	Unassigned	-
c75947747409f3da650ae31b3cb68607	0	0	0	221	701	0	2014	k__Fungi;p__Basidiomycota;c__Microbotryomycetes;o__Kriegeriales;f__Kriegeriaceae;g__Phenoliferia;s__Phenoliferia_glacialis;sh__SH1951657.10FU			Phenoliferia	13	Saprotroph	|Undefined Saprotroph|	Yeast	NULL	Probable	NULL	Pﾃｵlme S, et al. 2020. Fungal Diversity 105:1-16 ((https://doi.org/10.1007/s13225-020-00466-2))
9fe1f2cbb775e83e51a12afc0d795956	0	0	0	0	0	0	1727	k__Fungi			-	-	-	-	-	-	-	Unassigned	-
70375dcbf16d323b2be5eab8ebdda6f0	0	0	0	1194	762	0	1547	k__Fungi;p__Ascomycota;c__Leotiomycetes;o__Helotiales;f__Pezizellaceae;g__Chalara;s__Chalara_sp;sh__SH1370936.10FU			Chalara	13	Pathotroph-Saprotroph-Symbiotroph	Endophyte-Plant Pathogen-|Plant Saprotroph|-Wood Saprotroph	Microfungus	Soft Rot	Probable	As foliar_endophyte (Pﾃｵlme et al. 2020); As litter_saprotroph (Pﾃｵlme et al. 2020); As wood_pathogen (Pﾃｵlme et al. 2020); Decay wood, leaf, fruit, seed (Pﾃｵlme et al. 2020)	Duncan CG, Eslyn WE. 1966. Mycologia 58:642-645 ((https://doi.org/10.2307/3757045)); Tedersoo L, et al. 2014. Science 346:e1256688 ((https://doi.org/10.1126/science.1256688)); Pﾃｵlme S, et al. 2020. Fungal Diversity 105:1-16 ((https://doi.org/10.1007/s13225-020-00466-2))
a7872238bc2c9bf51dfbef36ac74c7e7	1974	101	0	0	753	1287	937	k__Fungi;p__Ascomycota			-	-	-	-	-	-	-	Unassigned	-
ed216aec7d7dccdabd158105d9b8b57c	0	0	0	0	0	0	591	k__Fungi;p__Ascomycota;c__Pezizomycetes;o__Pezizales;f__Pyronemataceae;g__Geopora;s__Geopora_sp;sh__SH1153460.10FU			Geopora	13	Symbiotroph	|Ectomycorrhizal|	Pezizoid	NULL	Highly Probable	NULL	Rinaldi AC, et al. 2008. Fungal Diversity 33:1-45 ((http://www.fungaldiversity.org/fdp/sfdp/33-1.pdf)); Tedersoo L, et al. 2010. Mycorrhiza 20:217-263 ((https://doi.org/10.1007/s00572-009-0274-x)); Pﾃｵlme S, et al. 2020. Fungal Diversity 105:1-16 ((https://doi.org/10.1007/s13225-020-00466-2)); http://mycorrhizas.info/ecmf.html ((http://mycorrhizas.info/ecmf.html))
87014a8c1783cf0ef98e46b70bccc69b	0	0	0	0	0	0	399	k__Fungi;p__Ascomycota;c__Sordariomycetes;o__Diaporthomycetidae_ord_Incertae_sedis;f__Thyridiaceae;g__Thyridium;s__Thyridium_curvatum;sh__SH1594546.10FU			Thyridium	13	Saprotroph	|Wood Saprotroph|	Microfungus	NULL	Probable	Decay wood (Pﾃｵlme et al. 2020)	Tedersoo L, et al. 2014. Science 346:e1256688 ((https://doi.org/10.1126/science.1256688)); Pﾃｵlme S, et al. 2020. Fungal Diversity 105:1-16 ((https://doi.org/10.1007/s13225-020-00466-2))
48ca30b012ef725cf0bba838295e7460	0	0	0	0	0	0	348	k__Fungi			-	-	-	-	-	-	-	Unassigned	-
dd5b811b7dba6675eb445ed8552d65cb	0	0	0	0	0	0	214	k__Fungi;p__Ascomycota;c__Dothideomycetes;o__Pleosporales;f__Didymellaceae			Didymellaceae	9	Pathotroph-Saprotroph	Animal Pathogen-Plant Pathogen-Undefined Saprotroph	Microfungus	NULL	Possible	NULL	Tedersoo L, et al. 2014. Science 346:e1256688 ((https://doi.org/10.1126/science.1256688))
5ac095790adea5b4ebf023a0135f2d59	0	0	0	0	0	0	124	k__Fungi			-	-	-	-	-	-	-	Unassigned	-
1153b56dd7112f997ea5f7a8fe8e7df1	0	0	0	0	0	0	123	k__Fungi;p__Fungi_phy_Incertae_sedis;c__Fungi_cls_Incertae_sedis;o__Fungi_ord_Incertae_sedis;f__Fungi_fam_Incertae_sedis;g__Fungi_gen_Incertae_sedis;s__Fungi_sp;sh__SH1296435.10FU			-	-	-	-	-	-	-	Unassigned	-
07e66833cd28541b0599c2ac98cf7ac4	0	0	0	0	0	0	110	k__Fungi			-	-	-	-	-	-	-	Unassigned	-
b8766cf7c977fdbfa0f4279cd6deb638	0	0	0	0	0	0	92	k__Fungi;p__Fungi_phy_Incertae_sedis;c__Fungi_cls_Incertae_sedis;o__Fungi_ord_Incertae_sedis;f__Fungi_fam_Incertae_sedis;g__Fungi_gen_Incertae_sedis;s__Fungi_sp			-	-	-	-	-	-	-	Unassigned	-
49164c44ef58cb92c98344299d577b49	0	0	0	0	0	0	49	k__Fungi;p__Ascomycota;c__Lecanoromycetes;o__Caliciales;f__Physciaceae;g__Rinodina;s__Rinodina_sp;sh__SH0002150.10FU			Rinodina	13	Symbiotroph	|Lichenized|	Thallus	NULL	Highly Probable	NULL	Esslinger TL. 2014. North Dakota State University ((http://www.ndsu.edu/pubweb/~esslinge/chcklst/chcklst7.htm)); Pﾃｵlme S, et al. 2020. Fungal Diversity 105:1-16 ((https://doi.org/10.1007/s13225-020-00466-2))
9cd9d1932944713bd9cb2fea08db6a04	0	0	0	0	0	0	26	k__Fungi;p__Basidiomycota;c__Agaricomycetes;o__Cantharellales;f__Ceratobasidiaceae;g__Ceratobasidium;s__Ceratobasidium_sp			Ceratobasidium	13	Pathotroph-Saprotroph-Symbiotroph	Ectomycorrhizal-Endomycorrhizal-Orchid Mycorrhizal-|Plant Pathogen|-Plant Saprotroph-Undefined Saprotroph	Corticioid-Microfungus	NULL	Possible	especially of Orchidaceae but also even bryophytes (Cannon & Kirk 2007); As litter_saprotroph (Pﾃｵlme et al. 2020); Best known as plant pathogens, but also saprobic. Species are endomycorrhizal with a wide range of plant roots ; Decay leaf, fruit, seed, roots, soil (Pﾃｵlme et al. 2020)	Cannon PF, Kirk PM. 2007. Fungal Families of the World. CAB International, Cambridge (ISBN: 978-0851998275); Tedersoo L, et al. 2014. Science 346:e1256688 ((https://doi.org/10.1126/science.1256688)); Pﾃｵlme S, et al. 2020. Fungal Diversity 105:1-16 ((https://doi.org/10.1007/s13225-020-00466-2))
46d7910a0db7fabdc16a017df5e4e75d	333	0	0	0	0	1715	0	k__Fungi;p__Ascomycota;c__Orbiliomycetes;o__Orbiliales;f__Orbiliales_fam_Incertae_sedis;g__Orbiliales_gen_Incertae_sedis;s__Orbiliales_sp;sh__SH1413079.10FU			-	-	-	-	-	-	-	Unassigned	-
b95cae20d0e4c7240601c5da313dc289	0	0	0	0	0	1320	0	k__Fungi			-	-	-	-	-	-	-	Unassigned	-
f9e5fb2475528c8476b96c79de23808b	0	0	0	176	1058	1249	0	k__Fungi;p__Ascomycota;c__Dothideomycetes;o__Pleosporales;f__Didymellaceae			Didymellaceae	9	Pathotroph-Saprotroph	Animal Pathogen-Plant Pathogen-Undefined Saprotroph	Microfungus	NULL	Possible	NULL	Tedersoo L, et al. 2014. Science 346:e1256688 ((https://doi.org/10.1126/science.1256688))
81f1170107c09f203b090f058b1617ab	1126	785	1386	0	0	902	0	k__Fungi;p__Fungi_phy_Incertae_sedis;c__Fungi_cls_Incertae_sedis;o__Fungi_ord_Incertae_sedis;f__Fungi_fam_Incertae_sedis;g__Fungi_gen_Incertae_sedis;s__Fungi_sp			-	-	-	-	-	-	-	Unassigned	-
1186a4492a11260966783e051fdfd83d	0	0	0	0	0	864	0	k__Fungi			-	-	-	-	-	-	-	Unassigned	-
17625191f4cc829274285fb5977ed796	0	0	0	0	0	362	0	k__Fungi;p__Basidiomycota;c__Agaricomycetes;o__Polyporales;f__Polyporaceae			Polyporaceae	9	Saprotroph	Wood Saprotroph	Polyporoid	Brown Rot-White Rot	Probable	Lignicolous, causing brown or white rot, mostly of broadleaved trees (Cannon & Kirk 2007)	Cannon PF, Kirk PM. 2007. Fungal Families of the World. CAB International, Cambridge (ISBN: 978-0851998275)
97b3243b602cf31cbf2befe439db9c7d	0	0	0	0	0	259	0	k__Fungi;p__Chytridiomycota;c__Chytridiomycota_cls_Incertae_sedis;o__Chytridiomycota_ord_Incertae_sedis;f__Chytridiomycota_fam_Incertae_sedis;g__Chytridiomycota_gen_Incertae_sedis;s__Chytridiomycota_sp;sh__SH1372582.10FU			-	-	-	-	-	-	-	Unassigned	-
99775c06313a3d985a3a686778397ff5	0	0	0	0	0	228	0	k__Fungi			-	-	-	-	-	-	-	Unassigned	-
9044f8c7d5749fd5b5652d3af809a989	0	0	0	0	0	157	0	k__Fungi			-	-	-	-	-	-	-	Unassigned	-
f40c6a1390fee3549193bac66ff2da64	0	0	0	186	0	128	0	k__Fungi;p__Ascomycota;c__Orbiliomycetes;o__Orbiliales;f__Orbiliales_fam_Incertae_sedis;g__Orbiliales_gen_Incertae_sedis;s__Orbiliales_sp;sh__SH1413079.10FU			-	-	-	-	-	-	-	Unassigned	-
e2eba8162ff4ecc6ce4486334699b39c	0	0	0	0	4819	0	0	k__Fungi;p__Basidiomycota;c__Agaricomycetes;o__Atheliales;f__Atheliaceae;g__Athelia;s__Athelia_arachnoidea;sh__SH1197197.10FU			Athelia	13	Pathotroph-Saprotroph-Symbiotroph	Algal Parasite-Epiphyte-|Lichen Parasite|-Lichenized-Plant Pathogen-Plant Saprotroph-Wood Saprotroph	Corticioid-Thallus	NULL	Possible	Decay fungal material, algal material (Pﾃｵlme et al. 2020); Host - algae (Pﾃｵlme et al. 2020); Lichenized and non; lichenized taxa	Adams GC, Kropp BR. 1996. Mycologia 88:459-472 ((https://doi.org/10.1080/00275514.1996.12026672)); Carisse O, et al. 2000.Phytopathology 90:31-37 ((https://doi.org/10.1094/PHYTO.2000.90.1.31)); Esslinger TL. 2014. North Dakota State University ((http://www.ndsu.edu/pubweb/~esslinge/chcklst/chcklst7.htm)); Pﾃｵlme S, et al. 2020. Fungal Diversity 105:1-16 ((https://doi.org/10.1007/s13225-020-00466-…
286dd2c5a0dc702a0a67d38f7149cc42	0	0	0	0	2816	0	0	k__Fungi;p__Ascomycota;c__Eurotiomycetes;o__Sclerococcales;f__Sclerococcales_fam_Incertae_sedis;g__Sclerococcales_gen_Incertae_sedis;s__Sclerococcales_sp;sh__SH1323905.10FU			-	-	-	-	-	-	-	Unassigned	-
2e1affab1ab433f9396fd32287e9b68b	0	0	0	0	1499	0	0	k__Fungi;p__Basidiomycota;c__Tremellomycetes;o__Cystofilobasidiales;f__Mrakiaceae;g__Mrakia;s__Mrakia_soli;sh__SH1329985.10FU			Mrakia	13	Saprotroph	|Undefined Saprotroph|	Dimorphic-Yeast	NULL	Probable	Isolated from water scums (Jones & Sloof 1966); isolated from Antarctic soil (Xin & Zhou 2007)	Jones EBG, Slooff WC. 1966. Antonie van Leeuwenhoek 32:223-228 ((https://doi.org/10.1007/BF02097464)); Xin M-X, Zhou P-J. 2007. Journal of Zhejiang University SCIENCE B. 8:260-265 ((https://doi.org/10.1631/jzus.2007.B0260)); Pﾃｵlme S, et al. 2020. Fungal Diversity 105:1-16 ((https://doi.org/10.1007/s13225-020-00466-2))
730cae1f39ca7ebf286c72783ff0bd44	0	30	0	0	1065	0	0	k__Fungi			-	-	-	-	-	-	-	Unassigned	-
d7791a05d8435e247868ccace4e51165	0	0	0	0	831	0	0	k__Fungi;p__Fungi_phy_Incertae_sedis;c__Fungi_cls_Incertae_sedis;o__Fungi_ord_Incertae_sedis;f__Fungi_fam_Incertae_sedis;g__Fungi_gen_Incertae_sedis;s__Fungi_sp;sh__SH0099042.10FU			-	-	-	-	-	-	-	Unassigned	-
923ada08eec2e4775fef6f609b0f2efd	0	0	0	0	797	0	0	k__Fungi;p__Ascomycota;c__Pezizomycetes;o__Pezizales;f__Pyronemataceae;g__Geopora;s__Geopora_sp;sh__SH1153460.10FU			Geopora	13	Symbiotroph	|Ectomycorrhizal|	Pezizoid	NULL	Highly Probable	NULL	Rinaldi AC, et al. 2008. Fungal Diversity 33:1-45 ((http://www.fungaldiversity.org/fdp/sfdp/33-1.pdf)); Tedersoo L, et al. 2010. Mycorrhiza 20:217-263 ((https://doi.org/10.1007/s00572-009-0274-x)); Pﾃｵlme S, et al. 2020. Fungal Diversity 105:1-16 ((https://doi.org/10.1007/s13225-020-00466-2)); http://mycorrhizas.info/ecmf.html ((http://mycorrhizas.info/ecmf.html))
348c2ff39480e51d880d8aaa818891ad	0	0	0	0	793	0	0	k__Fungi			-	-	-	-	-	-	-	Unassigned	-
96523720cf8e4c3b7b062ba6633ce0da	0	0	0	0	734	0	0	k__Fungi;p__Chytridiomycota;c__Rhizophydiomycetes;o__Rhizophydiales;f__Rhizophydiales_fam_Incertae_sedis;g__Rhizophydiales_gen_Incertae_sedis;s__Rhizophydiales_sp;sh__SH1067565.10FU			-	-	-	-	-	-	-	Unassigned	-
207d5cf00486d9be5df8f9ad384fe25c	0	0	0	0	701	0	0	k__Fungi;p__Ascomycota;c__Orbiliomycetes;o__Orbiliales;f__Orbiliales_fam_Incertae_sedis;g__Orbiliales_gen_Incertae_sedis;s__Orbiliales_sp;sh__SH1413079.10FU			-	-	-	-	-	-	-	Unassigned	-
778693ed4cb234624dd4c2864112a82c	0	0	0	0	699	0	0	k__Fungi;p__Ascomycota;c__Pezizomycetes;o__Pezizales;f__Pyronemataceae;g__Geopora;s__Geopora_sp;sh__SH1153460.10FU			Geopora	13	Symbiotroph	|Ectomycorrhizal|	Pezizoid	NULL	Highly Probable	NULL	Rinaldi AC, et al. 2008. Fungal Diversity 33:1-45 ((http://www.fungaldiversity.org/fdp/sfdp/33-1.pdf)); Tedersoo L, et al. 2010. Mycorrhiza 20:217-263 ((https://doi.org/10.1007/s00572-009-0274-x)); Pﾃｵlme S, et al. 2020. Fungal Diversity 105:1-16 ((https://doi.org/10.1007/s13225-020-00466-2)); http://mycorrhizas.info/ecmf.html ((http://mycorrhizas.info/ecmf.html))
7a204355a5d6e4ac6744b85799bf77f9	0	0	0	0	696	0	0	k__Fungi;p__Mucoromycota;c__Mucoromycetes;o__Mucorales;f__Mucoraceae;g__Mucor;s__Mucor_hiemalis			Mucor	13	Saprotroph	|Undefined Saprotroph|	Microfungus	NULL	Probable	As soil_saprotroph (Pﾃｵlme et al. 2020); Decay soil (Pﾃｵlme et al. 2020)	Tedersoo L, et al. 2014. Science 346:e1256688 ((https://doi.org/10.1126/science.1256688)); Pﾃｵlme S, et al. 2020. Fungal Diversity 105:1-16 ((https://doi.org/10.1007/s13225-020-00466-2))
bf368711e2b2af4f07d73353132e993b	0	0	0	0	657	0	0	k__Fungi;p__Basidiomycota;c__Malasseziomycetes;o__Malasseziales;f__Malasseziaceae;g__Malassezia;s__Malassezia_sp;sh__SH1316101.10FU			Malassezia	13	Pathotroph-Saprotroph	Animal Pathogen-|Undefined Saprotroph|	Facultative Yeast-Yeast	NULL	Probable	A lipid; As soil_saprotroph (Pﾃｵlme et al. 2020); Decay roots, soil (Pﾃｵlme et al. 2020); dependent fungus growing on the sebaceous areas of human skin that may cause or exacerbate several skin diseases (Pityrosporum is a synonym that has been used for the yeast forms)	Kurtzman CP, et al. (eds.) 2011. The Yeasts, a Taxonomic Study. Fifth Edition. Vols 1-3. Elsevier, San Diego (ISBN: 9780444521491); Findley K, et al. 2013. Nature 498:367-370 ((https://doi.org/10.1038/nature12171)); Pﾃｵlme S, et al. 2020. Fungal Diversity 105:1-16 ((https://doi.org/10.1007/s13225-020-00466-2))
ac3632366c7457b6b2607d5bc39528d0	0	0	0	0	657	0	0	k__Fungi;p__Basidiomycota;c__Agaricomycetes			-	-	-	-	-	-	-	Unassigned	-
ae39317f21fffd151af6b096369f719b	0	0	0	0	579	0	0	k__Fungi;p__Ascomycota			-	-	-	-	-	-	-	Unassigned	-
2fdd61d677bd0aacdb7df2524791f877	0	0	0	0	523	0	0	k__Fungi;p__Ascomycota			-	-	-	-	-	-	-	Unassigned	-
2562559b7e86c3a0c6879436e75863ae	68	0	0	0	489	0	0	k__Fungi;p__Ascomycota			-	-	-	-	-	-	-	Unassigned	-
a856674fa0bb2ab1abf9d23b890d3fa7	0	0	0	0	433	0	0	k__Fungi;p__Ascomycota;c__Dothideomycetes;o__Pleosporales;f__Acrocalymmaceae;g__Acrocalymma;s__Acrocalymma_pterocarpi;sh__SH1342558.10FU			Acrocalymma	13	Saprotroph	Undefined Saprotroph-|Wood Saprotroph|	Microfungus	NULL	Probable	Decay wood (Pﾃｵlme et al. 2020)	Tedersoo L, et al. 2014. Science 346:e1256688 ((https://doi.org/10.1126/science.1256688)); Pﾃｵlme S, et al. 2020. Fungal Diversity 105:1-16 ((https://doi.org/10.1007/s13225-020-00466-2))
dca43a238d7d4433d4086a751ba48c3d	0	0	0	0	426	0	0	k__Fungi			-	-	-	-	-	-	-	Unassigned	-
a024b740f0f8d46d9fe5af017dd0fe05	0	0	0	0	424	0	0	k__Fungi;p__Ascomycota			-	-	-	-	-	-	-	Unassigned	-
9e80084dd557a47e9a0a4c372e1a066a	0	0	0	0	334	0	0	k__Fungi			-	-	-	-	-	-	-	Unassigned	-
03533efdedc6c01b7a8f1ab5cc06a6cc	0	0	0	0	332	0	0	k__Fungi;p__Chytridiomycota;c__Rhizophydiomycetes;o__Rhizophydiales;f__Alphamycetaceae;g__Betamyces;s__Betamyces_sp;sh__SH1360317.10FU			Betamyces	13	Pathotroph-Saprotroph	Plant Pathogen-|Pollen Saprotroph|	Chytrid-Microfungus	NULL	Possible	Decay pollen (Pﾃｵlme et al. 2020); Isolated from freshwater environments by pollen baiting (Letcher et al. 2012)	Letcher PM, et al. 2012. Nova Hedwigia 94:9-29 ((https://doi.org/10.1127/0029-5035/2012/0094-0009)); Pﾃｵlme S, et al. 2020. Fungal Diversity 105:1-16 ((https://doi.org/10.1007/s13225-020-00466-2))
d862a8a98ab115dd48ca8671915e42dd	0	0	0	0	320	0	0	k__Fungi;p__Chytridiomycota;c__Lobulomycetes;o__Lobulomycetales;f__Lobulomycetales_fam_Incertae_sedis;g__Lobulomycetales_gen_Incertae_sedis;s__Lobulomycetales_sp;sh__SH1058531.10FU			-	-	-	-	-	-	-	Unassigned	-
40181fd020454b36c65d9e9b3f3552f9	0	0	0	0	311	0	0	k__Fungi;p__Ascomycota;c__Orbiliomycetes;o__Orbiliales;f__Orbiliales_fam_Incertae_sedis;g__Orbiliales_gen_Incertae_sedis;s__Orbiliales_sp;sh__SH1413079.10FU			-	-	-	-	-	-	-	Unassigned	-
00d92822bea6ae110e4b9181ead73be3	600	23	0	0	264	0	0	k__Fungi;p__Ascomycota;c__Eurotiomycetes;o__Eurotiales;f__Aspergillaceae;g__Penicillium;s__Penicillium_bialowiezense;sh__SH1306242.10FU			Penicillium	13	Pathotroph-Saprotroph-Symbiotroph	Animal Parasite-Dung Saprotroph-Endophyte-Fungal Parasite-Plant Pathogen-|Undefined Saprotroph|-Wood Saprotroph	Microfungus	Soft Rot	Highly Probable	As foliar_endophyte (Pﾃｵlme et al. 2020); As mycoparasite (Pﾃｵlme et al. 2020); Decay soil (Pﾃｵlme et al. 2020)	Duncan CG, Eslyn WE. 1966. Mycologia 58:642-664 ((https://doi.org/10.2307/3757045)); Seehann G, et al. 1975. List of Fungi in Soft-Rot Tissue Tests. Institute fur Holzbiologie und Holzschutz, Bundesforschungsanstalt fur Forst - und Holzwirtshaft, Hamburg - Lohbrugge, Germany ((https://www.irg-wp.com/irgdocs/details.php?d6493033-c9ea-40f3-8e3e-5697f32d640d)); Costa IPMW, et al. 2012. Mycotaxon 119…
3a4095f4c4af5b8868233892bde7e4b7	0	0	0	0	234	0	0	k__Fungi			-	-	-	-	-	-	-	Unassigned	-
77ce0b8ea982b99947967e0795e4d7b1	0	0	0	0	228	0	0	k__Fungi;p__Ascomycota;c__Leotiomycetes;o__Helotiales;f__Sclerotiniaceae			Sclerotiniaceae	9	Pathotroph	Plant Pathogen	Microfungus	NULL	Probable	Primarily necrotrophs, infecting roots, leaves, fruits, seeds, etc. and causing moulds, damping off etc. Sclerotia often overwinter and can survive for long periods in soil (Cannon & Kirk 2007)	Cannon PF, Kirk PM. 2007. Fungal Families of the World. CAB International, Cambridge (ISBN: 978-0851998275)
7520809767e75eb46bc06b93772702c8	0	0	0	0	196	0	0	k__Fungi;p__Basidiomycota;c__Microbotryomycetes;o__Microbotryales;f__Microbotryales_fam_Incertae_sedis;g__Microbotryales_gen_Incertae_sedis;s__Microbotryales_sp;sh__SH1219273.10FU			-	-	-	-	-	-	-	Unassigned	-
a5640a30a1c91dd08c5e2e26ff0beff2	0	0	0	0	190	0	0	k__Fungi;p__Ascomycota;c__Eurotiomycetes;o__Eurotiales;f__Aspergillaceae;g__Penicillium;s__Penicillium_bialowiezense;sh__SH1306242.10FU			Penicillium	13	Pathotroph-Saprotroph-Symbiotroph	Animal Parasite-Dung Saprotroph-Endophyte-Fungal Parasite-Plant Pathogen-|Undefined Saprotroph|-Wood Saprotroph	Microfungus	Soft Rot	Highly Probable	As foliar_endophyte (Pﾃｵlme et al. 2020); As mycoparasite (Pﾃｵlme et al. 2020); Decay soil (Pﾃｵlme et al. 2020)	Duncan CG, Eslyn WE. 1966. Mycologia 58:642-664 ((https://doi.org/10.2307/3757045)); Seehann G, et al. 1975. List of Fungi in Soft-Rot Tissue Tests. Institute fur Holzbiologie und Holzschutz, Bundesforschungsanstalt fur Forst - und Holzwirtshaft, Hamburg - Lohbrugge, Germany ((https://www.irg-wp.com/irgdocs/details.php?d6493033-c9ea-40f3-8e3e-5697f32d640d)); Costa IPMW, et al. 2012. Mycotaxon 119…
e8cd1f8b897b5a0aa508653cca9e2f95	0	0	0	0	183	0	0	k__Fungi;p__Fungi_phy_Incertae_sedis;c__Fungi_cls_Incertae_sedis;o__Fungi_ord_Incertae_sedis;f__Fungi_fam_Incertae_sedis;g__Fungi_gen_Incertae_sedis;s__Fungi_sp			-	-	-	-	-	-	-	Unassigned	-
ad36c1df56f18e53984bfe7eb606b1c1	0	0	0	0	178	0	0	k__Fungi;p__Ascomycota;c__Eurotiomycetes;o__Chaetothyriales;f__Chaetothyriales_fam_Incertae_sedis;g__Chaetothyriales_gen_Incertae_sedis;s__Chaetothyriales_sp;sh__SH1171511.10FU			-	-	-	-	-	-	-	Unassigned	-
6af05815dbe27c5644c6ddf6d2794ebd	0	0	0	0	170	0	0	k__Fungi;p__Basidiomycota;c__Agaricomycetes;o__Agaricales;f__Schizophyllaceae;g__Schizophyllum;s__Schizophyllum_sp;sh__SH0049985.10FU			Schizophyllum	13	Saprotroph	Plant Saprotroph-|Wood Saprotroph|	Agaricoid	White Rot	Highly Probable	As litter_saprotroph (Pﾃｵlme et al. 2020); As white_rot (Pﾃｵlme et al. 2020); Decay wood, leaf, fruit, seed (Pﾃｵlme et al. 2020)	Ahmada SS, Miles PG. 1970. Genetical Research 15:19-28 ((https://doi.org/10.1017/S0016672300001336)); Pﾃｵlme S, et al. 2020. Fungal Diversity 105:1-16 ((https://doi.org/10.1007/s13225-020-00466-2))
6b98bab7ea6f527ddba9e9ecf4243a42	0	0	0	0	161	0	0	k__Fungi;p__Fungi_phy_Incertae_sedis;c__Fungi_cls_Incertae_sedis;o__Fungi_ord_Incertae_sedis;f__Fungi_fam_Incertae_sedis;g__Fungi_gen_Incertae_sedis;s__Fungi_sp;sh__SH1331697.10FU			-	-	-	-	-	-	-	Unassigned	-
f2e3d8fb65f7aef931660d1eecfd7818	0	0	0	0	151	0	0	k__Fungi;p__Aphelidiomycota;c__Aphelidiomycota_cls_Incertae_sedis;o__Aphelidiomycota_ord_Incertae_sedis;f__Aphelidiomycota_fam_Incertae_sedis;g__Aphelidiomycota_gen_Incertae_sedis;s__Aphelidiomycota_sp;sh__SH1256908.10FU			-	-	-	-	-	-	-	Unassigned	-
9a314439855d55f4cf6aa6abcfeaad86	0	0	0	0	122	0	0	k__Fungi			-	-	-	-	-	-	-	Unassigned	-
fbd1d44a7100a55a2462a1404f34d7b5	0	0	0	0	92	0	0	k__Fungi;p__Ascomycota;c__Orbiliomycetes;o__Orbiliales;f__Orbiliales_fam_Incertae_sedis;g__Orbiliales_gen_Incertae_sedis;s__Orbiliales_sp;sh__SH1413079.10FU			-	-	-	-	-	-	-	Unassigned	-
aa6b277c61c83bb458f651f588c97afc	0	0	0	0	90	0	0	k__Fungi;p__Ascomycota;c__Orbiliomycetes;o__Orbiliales;f__Orbiliales_fam_Incertae_sedis;g__Orbiliales_gen_Incertae_sedis;s__Orbiliales_sp;sh__SH1413079.10FU			-	-	-	-	-	-	-	Unassigned	-
6ce2145870039a238776375732ceae98	0	0	0	0	58	0	0	k__Fungi;p__Basidiomycota;c__Agaricomycetes;o__Agaricomycetes_ord_Incertae_sedis;f__Agaricomycetes_fam_Incertae_sedis;g__Agaricomycetes_gen_Incertae_sedis;s__Agaricomycetes_sp;sh__SH1178588.10FU			-	-	-	-	-	-	-	Unassigned	-
3e2123c493827bca00fb557116ae9f7d	0	0	0	0	56	0	0	k__Fungi;p__Basidiomycota;c__Agaricomycetes;o__Agaricales;f__Inocybaceae;g__Inocybe;s__Inocybe_griseolilacina			Inocybe	13	Symbiotroph	|Ectomycorrhizal|	Agaricoid	NULL	Highly Probable	Sensu stricto (Matheny 2009).	Rinaldi AC, et al. 2008. Fungal Diversity 33:1-45 ((http://www.fungaldiversity.org/fdp/sfdp/33-1.pdf)); Matheny PB. 2009. McIlvainea 18:11-21 ((https://namyco.org/docs/3_Matheny.pdf)); Tedersoo L, et al. 2010. Mycorrhiza 20:217-263 ((https://doi.org/10.1007/s00572-009-0274-x)); Pﾃｵlme S, et al. 2020. Fungal Diversity 105:1-16 ((https://doi.org/10.1007/s13225-020-00466-2)); http://mycorrhizas.info…
245daa374bed1ca732440b2e37435545	0	0	0	0	43	0	0	k__Fungi;p__Ascomycota;c__Orbiliomycetes;o__Orbiliales;f__Orbiliales_fam_Incertae_sedis;g__Orbiliales_gen_Incertae_sedis;s__Orbiliales_sp;sh__SH1413079.10FU			-	-	-	-	-	-	-	Unassigned	-
5e75e609b3ec34f1fb7014bd99206a1a	0	0	0	20661	0	0	0	k__Fungi;p__Mucoromycota;c__Mucoromycetes;o__Mucorales;f__Mucoraceae;g__Mucor;s__Mucor_abundans;sh__SH1323353.10FU			Mucor	13	Saprotroph	|Undefined Saprotroph|	Microfungus	NULL	Probable	As soil_saprotroph (Pﾃｵlme et al. 2020); Decay soil (Pﾃｵlme et al. 2020)	Tedersoo L, et al. 2014. Science 346:e1256688 ((https://doi.org/10.1126/science.1256688)); Pﾃｵlme S, et al. 2020. Fungal Diversity 105:1-16 ((https://doi.org/10.1007/s13225-020-00466-2))
476817fcaaf212b0f9b222425c2c298c	0	0	0	10368	0	0	0	k__Fungi;p__Chytridiomycota;c__Rhizophydiomycetes;o__Rhizophydiales;f__Alphamycetaceae;g__Betamyces;s__Betamyces_sp;sh__SH1360317.10FU			Betamyces	13	Pathotroph-Saprotroph	Plant Pathogen-|Pollen Saprotroph|	Chytrid-Microfungus	NULL	Possible	Decay pollen (Pﾃｵlme et al. 2020); Isolated from freshwater environments by pollen baiting (Letcher et al. 2012)	Letcher PM, et al. 2012. Nova Hedwigia 94:9-29 ((https://doi.org/10.1127/0029-5035/2012/0094-0009)); Pﾃｵlme S, et al. 2020. Fungal Diversity 105:1-16 ((https://doi.org/10.1007/s13225-020-00466-2))
c44e10786a8fad54bd7fcc4c4db6b761	0	0	0	1507	0	0	0	k__Fungi;p__Chytridiomycota;c__Lobulomycetes;o__Lobulomycetales;f__Lobulomycetales_fam_Incertae_sedis;g__Lobulomycetales_gen_Incertae_sedis;s__Lobulomycetales_sp;sh__SH1058531.10FU			-	-	-	-	-	-	-	Unassigned	-
18f28afcecc95fb8a91839991e114048	0	0	0	1298	0	0	0	k__Fungi;p__Fungi_phy_Incertae_sedis;c__Fungi_cls_Incertae_sedis;o__Fungi_ord_Incertae_sedis;f__Fungi_fam_Incertae_sedis;g__Fungi_gen_Incertae_sedis;s__Fungi_sp			-	-	-	-	-	-	-	Unassigned	-
92397757470a52e2794aadd237b6e6dd	0	0	0	1065	0	0	0	k__Fungi;p__Mucoromycota;c__Mucoromycetes;o__Mucorales;f__Mucoraceae;g__Mucor;s__Mucor_hiemalis			Mucor	13	Saprotroph	|Undefined Saprotroph|	Microfungus	NULL	Probable	As soil_saprotroph (Pﾃｵlme et al. 2020); Decay soil (Pﾃｵlme et al. 2020)	Tedersoo L, et al. 2014. Science 346:e1256688 ((https://doi.org/10.1126/science.1256688)); Pﾃｵlme S, et al. 2020. Fungal Diversity 105:1-16 ((https://doi.org/10.1007/s13225-020-00466-2))
1c988536ca12308630a6dbd4fc7592e2	0	0	0	990	0	0	0	k__Fungi;p__Ascomycota;c__Leotiomycetes;o__Helotiales;f__Pezizellaceae			-	-	-	-	-	-	-	Unassigned	-
b82c6427a7ad4ec66394335ab2f94c08	0	0	0	938	0	0	0	k__Fungi			-	-	-	-	-	-	-	Unassigned	-
d56717198425a5467c89a33a7f03dbc7	0	0	0	868	0	0	0	k__Fungi;p__Basidiomycota;c__Agaricomycetes;o__Agaricales;f__Hymenogastraceae;g__Hebeloma;s__Hebeloma_sp;sh__SH1376130.10FU			Hebeloma	13	Symbiotroph	|Ectomycorrhizal|	Agaricoid	NULL	Highly Probable	NULL	Rinaldi AC, et al. 2008. Fungal Diversity 33:1-45 ((http://www.fungaldiversity.org/fdp/sfdp/33-1.pdf)); Tedersoo L, et al. 2010. Mycorrhiza 20:217-263 ((https://doi.org/10.1007/s00572-009-0274-x)); Pﾃｵlme S, et al. 2020. Fungal Diversity 105:1-16 ((https://doi.org/10.1007/s13225-020-00466-2)); http://mycorrhizas.info/ecmf.html ((http://mycorrhizas.info/ecmf.html))
190a590b5c5a5c5d4a1a538d0b7b7ecb	0	0	0	836	0	0	0	k__Fungi;p__Ascomycota;c__Eurotiomycetes;o__Verrucariales;f__Verrucariaceae;g__Verrucaria;s__Verrucaria_sp			Verrucaria	13	Symbiotroph	|Lichenized|	Thallus	NULL	Highly Probable	NULL	Esslinger TL. 2014. North Dakota State University ((http://www.ndsu.edu/pubweb/~esslinge/chcklst/chcklst7.htm)); Pﾃｵlme S, et al. 2020. Fungal Diversity 105:1-16 ((https://doi.org/10.1007/s13225-020-00466-2))
5eb9d844c81fb1ac9966a868b09b8be5	0	0	0	723	0	0	0	k__Fungi;p__Basidiomycota;c__Agaricomycetes;o__Agaricales;f__Hygrophoraceae;g__Arrhenia;s__Arrhenia_lobata;sh__SH1189100.10FU			Arrhenia	13	Pathotroph-Saprotroph	Bryophyte Parasite-|Plant Saprotroph|-Undefined Saprotroph	Agaricoid	NULL	Probable	As bryophilous (Pﾃｵlme et al. 2020); As litter_saprotroph (Pﾃｵlme et al. 2020); Decay leaf, fruit, seed (Pﾃｵlme et al. 2020)	Tedersoo L, et al. 2014. Science 346:e1256688 ((https://doi.org/10.1126/science.1256688)); Pﾃｵlme S, et al. 2020. Fungal Diversity 105:1-16 ((https://doi.org/10.1007/s13225-020-00466-2))
2e333b3a417330d6419067ba074e9ca6	0	0	0	672	0	0	0	k__Fungi			-	-	-	-	-	-	-	Unassigned	-
3981700fab05a1254322397596b6417e	0	0	0	539	0	0	0	k__Fungi;p__Ascomycota			-	-	-	-	-	-	-	Unassigned	-
098bb48ab1277ac2efab76c4a64c8473	0	0	0	441	0	0	0	k__Fungi;p__Ascomycota;c__Leotiomycetes;o__Helotiales;f__Helotiales_fam_Incertae_sedis;g__Helotiales_gen_Incertae_sedis;s__Helotiales_sp;sh__SH1387980.10FU			-	-	-	-	-	-	-	Unassigned	-
dcf136e2908cd4330fd1529caa8cd414	0	0	0	387	0	0	0	k__Fungi;p__Basidiomycota;c__Malasseziomycetes;o__Malasseziales;f__Malasseziaceae;g__Malassezia;s__Malassezia_restricta;sh__SH1382014.10FU			Malassezia	13	Pathotroph-Saprotroph	Animal Pathogen-|Undefined Saprotroph|	Facultative Yeast-Yeast	NULL	Probable	A lipid; As soil_saprotroph (Pﾃｵlme et al. 2020); Decay roots, soil (Pﾃｵlme et al. 2020); dependent fungus growing on the sebaceous areas of human skin that may cause or exacerbate several skin diseases (Pityrosporum is a synonym that has been used for the yeast forms)	Kurtzman CP, et al. (eds.) 2011. The Yeasts, a Taxonomic Study. Fifth Edition. Vols 1-3. Elsevier, San Diego (ISBN: 9780444521491); Findley K, et al. 2013. Nature 498:367-370 ((https://doi.org/10.1038/nature12171)); Pﾃｵlme S, et al. 2020. Fungal Diversity 105:1-16 ((https://doi.org/10.1007/s13225-020-00466-2))
ae01dbcf2b2ea8665799fa65f17ad687	0	0	0	384	0	0	0	k__Fungi;p__Fungi_phy_Incertae_sedis;c__Fungi_cls_Incertae_sedis;o__Fungi_ord_Incertae_sedis;f__Fungi_fam_Incertae_sedis;g__Fungi_gen_Incertae_sedis;s__Fungi_sp;sh__SH1331697.10FU			-	-	-	-	-	-	-	Unassigned	-
3af5156732dbb1128992b312ff9b9b56	0	0	0	154	0	0	0	k__Fungi;p__Basidiomycota;c__Agaricomycetes;o__Hymenochaetales;f__Neoantrodiellaceae;g__Neoantrodiella;s__Neoantrodiella_thujae;sh__SH1932272.10FU			Neoantrodiella	13	Saprotroph	|Wood Saprotroph|	Polyporoid	White Rot	Probable	As white_rot (Pﾃｵlme et al. 2020); Decay wood (Pﾃｵlme et al. 2020)	Pﾃｵlme S, et al. 2020. Fungal Diversity 105:1-16 ((https://doi.org/10.1007/s13225-020-00466-2))
d93e924abd96baa7ea0665093d45e631	0	0	0	149	0	0	0	k__Fungi;p__Fungi_phy_Incertae_sedis;c__Fungi_cls_Incertae_sedis;o__Fungi_ord_Incertae_sedis;f__Fungi_fam_Incertae_sedis;g__Fungi_gen_Incertae_sedis;s__Fungi_sp			-	-	-	-	-	-	-	Unassigned	-
e8e2b0cd8e41a3f1fb743b19a29d6172	0	0	0	104	0	0	0	k__Fungi			-	-	-	-	-	-	-	Unassigned	-
139020436525ed1cd71c91fd7baa88bb	0	0	0	101	0	0	0	k__Fungi;p__Basidiomycota;c__Malasseziomycetes;o__Malasseziales;f__Malasseziaceae;g__Malassezia;s__Malassezia_restricta;sh__SH1382014.10FU			Malassezia	13	Pathotroph-Saprotroph	Animal Pathogen-|Undefined Saprotroph|	Facultative Yeast-Yeast	NULL	Probable	A lipid; As soil_saprotroph (Pﾃｵlme et al. 2020); Decay roots, soil (Pﾃｵlme et al. 2020); dependent fungus growing on the sebaceous areas of human skin that may cause or exacerbate several skin diseases (Pityrosporum is a synonym that has been used for the yeast forms)	Kurtzman CP, et al. (eds.) 2011. The Yeasts, a Taxonomic Study. Fifth Edition. Vols 1-3. Elsevier, San Diego (ISBN: 9780444521491); Findley K, et al. 2013. Nature 498:367-370 ((https://doi.org/10.1038/nature12171)); Pﾃｵlme S, et al. 2020. Fungal Diversity 105:1-16 ((https://doi.org/10.1007/s13225-020-00466-2))
02137084827712a6dbcfa025b101ea2b	0	0	0	96	0	0	0	k__Fungi;p__Chytridiomycota;c__Rhizophydiomycetes;o__Rhizophydiales;f__Alphamycetaceae;g__Betamyces;s__Betamyces_sp			Betamyces	13	Pathotroph-Saprotroph	Plant Pathogen-|Pollen Saprotroph|	Chytrid-Microfungus	NULL	Possible	Decay pollen (Pﾃｵlme et al. 2020); Isolated from freshwater environments by pollen baiting (Letcher et al. 2012)	Letcher PM, et al. 2012. Nova Hedwigia 94:9-29 ((https://doi.org/10.1127/0029-5035/2012/0094-0009)); Pﾃｵlme S, et al. 2020. Fungal Diversity 105:1-16 ((https://doi.org/10.1007/s13225-020-00466-2))
271b8551daabb74ca883d75308ea0583	0	0	0	87	0	0	0	k__Fungi;p__Ascomycota;c__Sordariomycetes			-	-	-	-	-	-	-	Unassigned	-
34491974882a725e1ea639afa9a80e80	0	0	0	45	0	0	0	k__Fungi;p__Ascomycota;c__Dothideomycetes			-	-	-	-	-	-	-	Unassigned	-
5f75361dbeb0c262776bb19bef7cb506	0	0	2789	0	0	0	0	k__Fungi;p__Ascomycota;c__Eurotiomycetes;o__Verrucariales;f__Verrucariaceae;g__Atla			Atla	13	Symbiotroph	|Lichenized|	Microfungus-Thallus	NULL	Probable	NULL	Tedersoo L, et al. 2014. Science 346:e1256688 ((https://doi.org/10.1126/science.1256688)); Pﾃｵlme S, et al. 2020. Fungal Diversity 105:1-16 ((https://doi.org/10.1007/s13225-020-00466-2))
831d1d663dc5048d94a3da393c815b82	0	0	1466	0	0	0	0	k__Fungi;p__Basidiomycota;c__Tremellomycetes;o__Tremellomycetes_ord_Incertae_sedis;f__Tremellomycetes_fam_Incertae_sedis;g__Tremellomycetes_gen_Incertae_sedis;s__Tremellomycetes_sp;sh__SH0079208.10FU			-	-	-	-	-	-	-	Unassigned	-
a7dd73d3e408b47332ad902c37ced1f2	0	0	775	0	0	0	0	k__Fungi			-	-	-	-	-	-	-	Unassigned	-
9a266ba04dd5e033672429a56d6e5b88	0	0	173	0	0	0	0	k__Fungi;p__Sanchytriomycota;c__Sanchytriomycetes;o__Sanchytriales;f__Sanchytriaceae;g__Sanchytrium;s__Sanchytrium_sp			Sanchytrium	13	Pathotroph	|Algal Parasite|	Chytrid-Microfungus	NULL	Probable	Decay algal material (Pﾃｵlme et al. 2020); Host - algae (Pﾃｵlme et al. 2020)	Pﾃｵlme S, et al. 2020. Fungal Diversity 105:1-16 ((https://doi.org/10.1007/s13225-020-00466-2))
90ecea57be337367ad8549621998f61f	2090	489	0	0	0	0	0	k__Fungi;p__Fungi_phy_Incertae_sedis;c__Fungi_cls_Incertae_sedis;o__Fungi_ord_Incertae_sedis;f__Fungi_fam_Incertae_sedis;g__Fungi_gen_Incertae_sedis;s__Fungi_sp;sh__SH0160705.10FU			-	-	-	-	-	-	-	Unassigned	-
2796300c15e48c337e07f91d8d6ab8c1	0	338	0	0	0	0	0	k__Fungi;p__Basidiomycota;c__Agaricomycetes;o__Sebacinales;f__Serendipitaceae;g__Serendipita;s__Serendipita_sp			Serendipita	13	Saprotroph-Symbiotroph	Ectomycorrhizal-|Endophyte|-Ericoid Mycorrhizal-Orchid Mycorrhizal-Undefined Saprotroph	Microfungus	NULL	Highly Probable	As root_endophyte (Pﾃｵlme et al. 2020); As soil_saprotroph (Pﾃｵlme et al. 2020); Decay soil (Pﾃｵlme et al. 2020)	Tedersoo L, et al. 2010. Mycorrhiza 20:217-263 ((https://doi.org/10.1007/s00572-009-0274-x)) (pro parte); Weiﾃ M, et al. 2016. New Phytologist 211:20-40 ((https://doi.org/10.1111/nph.13977)); Pﾃｵlme S, et al. 2020. Fungal Diversity 105:1-16 ((https://doi.org/10.1007/s13225-020-00466-2))
5d5f782abc9547efcfeb372d2ca317d1	0	161	0	0	0	0	0	k__Fungi;p__Ascomycota;c__Sordariomycetes;o__Diaporthales;f__Gnomoniaceae			Gnomoniaceae	9	Pathotroph-Saprotroph-Symbiotroph	Endophyte-Plant Pathogen-Undefined Saprotroph	Microfungus	NULL	Probable	Most species are saprobes or endophytes in leaves and bark, but a few are neurotrophic pathogens (Cannon & Kirk 2007)	Cannon PF, Kirk PM. 2007. Fungal Families of the World. CAB International, Cambridge (ISBN: 978-0851998275)
4924f037e690c128452841f8a2692dc2	0	148	0	0	0	0	0	k__Fungi;p__Ascomycota;c__Dothideomycetes;o__Pleosporales;f__Acrocalymmaceae;g__Acrocalymma;s__Acrocalymma_pterocarpi;sh__SH1342558.10FU			Acrocalymma	13	Saprotroph	Undefined Saprotroph-|Wood Saprotroph|	Microfungus	NULL	Probable	Decay wood (Pﾃｵlme et al. 2020)	Tedersoo L, et al. 2014. Science 346:e1256688 ((https://doi.org/10.1126/science.1256688)); Pﾃｵlme S, et al. 2020. Fungal Diversity 105:1-16 ((https://doi.org/10.1007/s13225-020-00466-2))
b3102e9fc3ae6cee7dd7de1646bb1199	5511	86	0	0	0	0	0	k__Fungi;p__Basidiomycota;c__Agaricomycetes;o__Polyporales;f__Polyporaceae			Polyporaceae	9	Saprotroph	Wood Saprotroph	Polyporoid	Brown Rot-White Rot	Probable	Lignicolous, causing brown or white rot, mostly of broadleaved trees (Cannon & Kirk 2007)	Cannon PF, Kirk PM. 2007. Fungal Families of the World. CAB International, Cambridge (ISBN: 978-0851998275)
a256ae687546fda6508e4e15ef6f5b48	0	46	0	0	0	0	0	k__Fungi;p__Chytridiomycota;c__Chytridiomycota_cls_Incertae_sedis;o__Chytridiomycota_ord_Incertae_sedis;f__Chytridiomycota_fam_Incertae_sedis;g__Chytridiomycota_gen_Incertae_sedis;s__Chytridiomycota_sp;sh__SH1372582.10FU			-	-	-	-	-	-	-	Unassigned	-
db4ce3086d341775f08d930d2290fc0d	59	43	0	0	0	0	0	k__Fungi			-	-	-	-	-	-	-	Unassigned	-
ef838597e0c8811d667a2f094ddaa28e	0	41	0	0	0	0	0	k__Fungi;p__Chytridiomycota;c__Lobulomycetes;o__Lobulomycetales;f__Lobulomycetales_fam_Incertae_sedis;g__Lobulomycetales_gen_Incertae_sedis;s__Lobulomycetales_sp;sh__SH1058531.10FU			-	-	-	-	-	-	-	Unassigned	-
2b1a257e659674f0ada2141ac84e5dbb	33	40	0	0	0	0	0	k__Fungi			-	-	-	-	-	-	-	Unassigned	-
0553b27ed9f8b49c0bb305b9598fa3be	0	39	0	0	0	0	0	k__Fungi;p__Chytridiomycota;c__Rhizophydiomycetes;o__Rhizophydiales;f__Alphamycetaceae;g__Betamyces;s__Betamyces_sp;sh__SH1125756.10FU			Betamyces	13	Pathotroph-Saprotroph	Plant Pathogen-|Pollen Saprotroph|	Chytrid-Microfungus	NULL	Possible	Decay pollen (Pﾃｵlme et al. 2020); Isolated from freshwater environments by pollen baiting (Letcher et al. 2012)	Letcher PM, et al. 2012. Nova Hedwigia 94:9-29 ((https://doi.org/10.1127/0029-5035/2012/0094-0009)); Pﾃｵlme S, et al. 2020. Fungal Diversity 105:1-16 ((https://doi.org/10.1007/s13225-020-00466-2))
870d51717b8319988a55769bbb9ccad8	0	30	0	0	0	0	0	k__Fungi			-	-	-	-	-	-	-	Unassigned	-
ddf3bcf00c972a50c835946eb36f95a4	175	27	0	0	0	0	0	k__Fungi;p__Basidiomycota;c__Microbotryomycetes;o__Microbotryales;f__Microbotryales_fam_Incertae_sedis;g__Microbotryales_gen_Incertae_sedis;s__Microbotryales_sp;sh__SH1219273.10FU			-	-	-	-	-	-	-	Unassigned	-
3ad2ae550ef11f1777a680bf88646be3	0	23	0	0	0	0	0	k__Fungi			-	-	-	-	-	-	-	Unassigned	-
d918d99dd470b12bb5d74b61bfa4d94d	0	23	0	0	0	0	0	k__Fungi			-	-	-	-	-	-	-	Unassigned	-
6fb68535c1d350b86c39f65beabc0638	68	15	0	0	0	0	0	k__Fungi;p__Ascomycota;c__Leotiomycetes;o__Helotiales;f__Pezizellaceae;g__Chalara;s__Chalara_sp;sh__SH1370936.10FU			Chalara	13	Pathotroph-Saprotroph-Symbiotroph	Endophyte-Plant Pathogen-|Plant Saprotroph|-Wood Saprotroph	Microfungus	Soft Rot	Probable	As foliar_endophyte (Pﾃｵlme et al. 2020); As litter_saprotroph (Pﾃｵlme et al. 2020); As wood_pathogen (Pﾃｵlme et al. 2020); Decay wood, leaf, fruit, seed (Pﾃｵlme et al. 2020)	Duncan CG, Eslyn WE. 1966. Mycologia 58:642-645 ((https://doi.org/10.2307/3757045)); Tedersoo L, et al. 2014. Science 346:e1256688 ((https://doi.org/10.1126/science.1256688)); Pﾃｵlme S, et al. 2020. Fungal Diversity 105:1-16 ((https://doi.org/10.1007/s13225-020-00466-2))
5ab466cb5ebaa25852c0264e19f870bd	1447	12	0	0	0	0	0	k__Fungi;p__Ascomycota;c__Sordariomycetes;o__Diaporthales;f__Gnomoniaceae;g__Ophiognomonia;s__Ophiognomonia_japonica;sh__SH1671415.10FU			Ophiognomonia	13	Pathotroph	|Plant Pathogen|	Microfungus	NULL	Highly Probable	See Marssoniella juglandis, Ophiognomonia leptostyla, and Syn. Gnomonia leptostyla; Causes leaf blotch and spots, also known as walnut anthracnose or walnut black spot (Sogonov et al. 2008)	Sogonov MV, et al. 2008. Studies in Mycology 62:1-79 ((https://www.studiesinmycology.org/sim/Sim62/03_Leaf-inhabiting_genera_of_the_Gnomoniaceae,_Diaporthales.pdf)); Pﾃｵlme S, et al. 2020. Fungal Diversity 105:1-16 ((https://doi.org/10.1007/s13225-020-00466-2))
287e3af2ad5998b0320d91b7abfd1de2	0	8	0	0	0	0	0	k__Fungi;p__Fungi_phy_Incertae_sedis;c__Fungi_cls_Incertae_sedis;o__Fungi_ord_Incertae_sedis;f__Fungi_fam_Incertae_sedis;g__Fungi_gen_Incertae_sedis;s__Fungi_sp;sh__SH0168539.10FU			-	-	-	-	-	-	-	Unassigned	-
51060a68b763c0cfbd80a8d1a185dd6e	0	7	0	0	0	0	0	k__Fungi;p__Ascomycota;c__Dothideomycetes;o__Pleosporales;f__Pleosporales_fam_Incertae_sedis;g__Pleosporales_gen_Incertae_sedis;s__Pleosporales_sp;sh__SH1061741.10FU			-	-	-	-	-	-	-	Unassigned	-
86e03d52f9b447b484251c43617118c0	0	4	0	0	0	0	0	k__Fungi			-	-	-	-	-	-	-	Unassigned	-
d3167557b91a8112da1f8c350d0dd0ad	0	4	0	0	0	0	0	k__Fungi;p__Chytridiomycota;c__Chytridiomycota_cls_Incertae_sedis;o__Chytridiomycota_ord_Incertae_sedis;f__Chytridiomycota_fam_Incertae_sedis;g__Chytridiomycota_gen_Incertae_sedis;s__Chytridiomycota_sp;sh__SH0200956.10FU			-	-	-	-	-	-	-	Unassigned	-
51d5358d6b484109900c4f05d0514952	580	0	0	0	0	0	0	k__Fungi;p__Chytridiomycota;c__Rhizophydiomycetes;o__Rhizophydiales;f__Alphamycetaceae;g__Betamyces;s__Betamyces_sp;sh__SH1360317.10FU			Betamyces	13	Pathotroph-Saprotroph	Plant Pathogen-|Pollen Saprotroph|	Chytrid-Microfungus	NULL	Possible	Decay pollen (Pﾃｵlme et al. 2020); Isolated from freshwater environments by pollen baiting (Letcher et al. 2012)	Letcher PM, et al. 2012. Nova Hedwigia 94:9-29 ((https://doi.org/10.1127/0029-5035/2012/0094-0009)); Pﾃｵlme S, et al. 2020. Fungal Diversity 105:1-16 ((https://doi.org/10.1007/s13225-020-00466-2))
d85cd4acb4f1263267d4e03c15ecd950	333	0	0	0	0	0	0	k__Fungi			-	-	-	-	-	-	-	Unassigned	-
63b5b388bb2bc73fa6cadda5b22b6c30	299	0	0	0	0	0	0	k__Fungi;p__Basidiomycota;c__Agaricomycetes;o__Hymenochaetales;f__Neoantrodiellaceae;g__Neoantrodiella;s__Neoantrodiella_thujae;sh__SH1932272.10FU			Neoantrodiella	13	Saprotroph	|Wood Saprotroph|	Polyporoid	White Rot	Probable	As white_rot (Pﾃｵlme et al. 2020); Decay wood (Pﾃｵlme et al. 2020)	Pﾃｵlme S, et al. 2020. Fungal Diversity 105:1-16 ((https://doi.org/10.1007/s13225-020-00466-2))
8182e6e5eda6091d8091f40a30ff52d1	162	0	0	0	0	0	0	k__Fungi;p__Fungi_phy_Incertae_sedis;c__Fungi_cls_Incertae_sedis;o__Fungi_ord_Incertae_sedis;f__Fungi_fam_Incertae_sedis;g__Fungi_gen_Incertae_sedis;s__Fungi_sp;sh__SH0099042.10FU			-	-	-	-	-	-	-	Unassigned	-
4ee25388ecce066496ecf3b2c8961fc5	153	0	0	0	0	0	0	k__Fungi;p__Fungi_phy_Incertae_sedis;c__Fungi_cls_Incertae_sedis;o__Fungi_ord_Incertae_sedis;f__Fungi_fam_Incertae_sedis;g__Fungi_gen_Incertae_sedis;s__Fungi_sp;sh__SH1406665.10FU			-	-	-	-	-	-	-	Unassigned	-
b547ff0e472001efb025c0f2f09e70e3	152	0	0	0	0	0	0	k__Fungi;p__Ascomycota;c__Dothideomycetes;o__Pleosporales;f__Leptosphaeriaceae;g__Leptosphaeria;s__Leptosphaeria_sclerotioides;sh__SH1346588.10FU			Leptosphaeria	13	Pathotroph-Saprotroph	|Plant Pathogen|-Wood Saprotroph	Microfungus	NULL	Probable	As wood_pathogen (Pﾃｵlme et al. 2020); Decay wood (Pﾃｵlme et al. 2020)	Tedersoo L, et al. 2014. Science 346:e1256688 ((https://doi.org/10.1126/science.1256688)); Pﾃｵlme S, et al. 2020. Fungal Diversity 105:1-16 ((https://doi.org/10.1007/s13225-020-00466-2))
6114ddd43b18757d161b3d97f2d55ce5	148	0	0	0	0	0	0	k__Fungi			-	-	-	-	-	-	-	Unassigned	-
2c9f91eb1f8c2f1aab917d9c815ca79d	131	0	0	0	0	0	0	k__Fungi;p__Ascomycota;c__Leotiomycetes;o__Helotiales;f__Sclerotiniaceae;g__Botrytis;s__Botrytis_caroliniana;sh__SH1336761.10FU			Botrytis	13	Pathotroph-Saprotroph	|Plant Pathogen|-Plant Saprotroph	Microfungus	NULL	Probable	As litter_saprotroph (Pﾃｵlme et al. 2020); Decay leaf, fruit, seed (Pﾃｵlme et al. 2020)	Pﾃｵlme S, et al. 2020. Fungal Diversity 105:1-16 ((https://doi.org/10.1007/s13225-020-00466-2)); The American Phytopathological Society Common Names of Plant Diseases ((https://www.apsnet.org/edcenter/resources/commonnames/Pages/default.aspx))
ddf283577c89cec690a950e805e28f80	128	0	0	0	0	0	0	k__Fungi;p__Ascomycota;c__Leotiomycetes;o__Helotiales;f__Pezizellaceae;g__Chalara;s__Chalara_sp;sh__SH1370936.10FU			Chalara	13	Pathotroph-Saprotroph-Symbiotroph	Endophyte-Plant Pathogen-|Plant Saprotroph|-Wood Saprotroph	Microfungus	Soft Rot	Probable	As foliar_endophyte (Pﾃｵlme et al. 2020); As litter_saprotroph (Pﾃｵlme et al. 2020); As wood_pathogen (Pﾃｵlme et al. 2020); Decay wood, leaf, fruit, seed (Pﾃｵlme et al. 2020)	Duncan CG, Eslyn WE. 1966. Mycologia 58:642-645 ((https://doi.org/10.2307/3757045)); Tedersoo L, et al. 2014. Science 346:e1256688 ((https://doi.org/10.1126/science.1256688)); Pﾃｵlme S, et al. 2020. Fungal Diversity 105:1-16 ((https://doi.org/10.1007/s13225-020-00466-2))
4f5358b60286f2b87d935b45b67b0dc0	107	0	0	0	0	0	0	k__Fungi;p__Chytridiomycota;c__Rhizophydiomycetes;o__Rhizophydiales;f__Alphamycetaceae;g__Betamyces;s__Betamyces_sp;sh__SH1125756.10FU			Betamyces	13	Pathotroph-Saprotroph	Plant Pathogen-|Pollen Saprotroph|	Chytrid-Microfungus	NULL	Possible	Decay pollen (Pﾃｵlme et al. 2020); Isolated from freshwater environments by pollen baiting (Letcher et al. 2012)	Letcher PM, et al. 2012. Nova Hedwigia 94:9-29 ((https://doi.org/10.1127/0029-5035/2012/0094-0009)); Pﾃｵlme S, et al. 2020. Fungal Diversity 105:1-16 ((https://doi.org/10.1007/s13225-020-00466-2))
29b8102ca42596106cf7665608ac18b1	105	0	0	0	0	0	0	k__Fungi;p__Ascomycota;c__Eurotiomycetes;o__Verrucariales;f__Verrucariaceae;g__Verrucaria;s__Verrucaria_sp			Verrucaria	13	Symbiotroph	|Lichenized|	Thallus	NULL	Highly Probable	NULL	Esslinger TL. 2014. North Dakota State University ((http://www.ndsu.edu/pubweb/~esslinge/chcklst/chcklst7.htm)); Pﾃｵlme S, et al. 2020. Fungal Diversity 105:1-16 ((https://doi.org/10.1007/s13225-020-00466-2))
9d2e2988f3ed82367ba83da17fde0cdf	98	0	0	0	0	0	0	k__Fungi;p__Basidiomycota;c__Agaricomycetes;o__Sebacinales;f__Serendipitaceae;g__Serendipita;s__Serendipita_sp			Serendipita	13	Saprotroph-Symbiotroph	Ectomycorrhizal-|Endophyte|-Ericoid Mycorrhizal-Orchid Mycorrhizal-Undefined Saprotroph	Microfungus	NULL	Highly Probable	As root_endophyte (Pﾃｵlme et al. 2020); As soil_saprotroph (Pﾃｵlme et al. 2020); Decay soil (Pﾃｵlme et al. 2020)	Tedersoo L, et al. 2010. Mycorrhiza 20:217-263 ((https://doi.org/10.1007/s00572-009-0274-x)) (pro parte); Weiﾃ M, et al. 2016. New Phytologist 211:20-40 ((https://doi.org/10.1111/nph.13977)); Pﾃｵlme S, et al. 2020. Fungal Diversity 105:1-16 ((https://doi.org/10.1007/s13225-020-00466-2))
db64f52c9f7fc5c054e2545b7c9c66ed	80	0	0	0	0	0	0	k__Fungi;p__Sanchytriomycota;c__Sanchytriomycetes;o__Sanchytriales;f__Sanchytriaceae;g__Sanchytrium;s__Sanchytrium_sp			Sanchytrium	13	Pathotroph	|Algal Parasite|	Chytrid-Microfungus	NULL	Probable	Decay algal material (Pﾃｵlme et al. 2020); Host - algae (Pﾃｵlme et al. 2020)	Pﾃｵlme S, et al. 2020. Fungal Diversity 105:1-16 ((https://doi.org/10.1007/s13225-020-00466-2))
3251a5e500bcbb3a87e92fa7ba6d6adb	73	0	0	0	0	0	0	k__Fungi			-	-	-	-	-	-	-	Unassigned	-
8a91ca99c0146b4ac701a585c07e1a08	60	0	0	0	0	0	0	k__Fungi;p__Basidiomycota;c__Agaricomycetes;o__Polyporales;f__Polyporaceae;g__Microporus;s__Microporus_affinis;sh__SH1218939.10FU			Microporus	13	Saprotroph	Undefined Saprotroph-|Wood Saprotroph|	Polyporoid	White Rot	Probable	As white_rot (Pﾃｵlme et al. 2020); Decay wood (Pﾃｵlme et al. 2020)	Tedersoo L, et al. 2014. Science 346:e1256688 ((https://doi.org/10.1126/science.1256688)); Pﾃｵlme S, et al. 2020. Fungal Diversity 105:1-16 ((https://doi.org/10.1007/s13225-020-00466-2))
3c2a029adaf71cf0dfd59db53011dad2	49	0	0	0	0	0	0	k__Fungi;p__Sanchytriomycota;c__Sanchytriomycetes;o__Sanchytriales;f__Sanchytriaceae;g__Sanchytrium;s__Sanchytrium_sp			Sanchytrium	13	Pathotroph	|Algal Parasite|	Chytrid-Microfungus	NULL	Probable	Decay algal material (Pﾃｵlme et al. 2020); Host - algae (Pﾃｵlme et al. 2020)	Pﾃｵlme S, et al. 2020. Fungal Diversity 105:1-16 ((https://doi.org/10.1007/s13225-020-00466-2))
93801cc14cbaec494fa4d14f0ca88ece	39	0	0	0	0	0	0	k__Fungi;p__Ascomycota;c__Dothideomycetes;o__Pleosporales;f__Melanommataceae;g__Melanommataceae_gen_Incertae_sedis;s__Melanommataceae_sp			Melanommataceae	9	Saprotroph	Wood Saprotroph	Microfungus	NULL	Probable	Saprobic on wood and bark (Cannon & Kirk 2007)	Cannon PF, Kirk PM. 2007. Fungal Families of the World. CAB International, Cambridge (ISBN: 978-0851998275)
0d9c3f07996b8e5028a2273568b1d296	39	0	0	0	0	0	0	k__Fungi;p__Chytridiomycota;c__Rhizophydiomycetes;o__Rhizophydiales;f__Rhizophydiales_fam_Incertae_sedis;g__Rhizophydiales_gen_Incertae_sedis;s__Rhizophydiales_sp;sh__SH1067565.10FU			-	-	-	-	-	-	-	Unassigned	-
d18c5ba58b681e60241171c57689d366	35	0	0	0	0	0	0	k__Fungi;p__Ascomycota;c__Dothideomycetes;o__Pleosporales;f__Sporormiaceae;g__Preussia;s__Preussia_sp			Preussia	13	Saprotroph	|Dung Saprotroph|-Undefined Saprotroph	Microfungus	NULL	Probable	Decay dung (Pﾃｵlme et al. 2020)	Tedersoo L, et al. 2014. Science 346:e1256688 ((https://doi.org/10.1126/science.1256688)); Pﾃｵlme S, et al. 2020. Fungal Diversity 105:1-16 ((https://doi.org/10.1007/s13225-020-00466-2))
93b22a7e4c2632944bcd2ae6d0844f89	21	0	0	0	0	0	0	k__Fungi;p__Ascomycota;c__Sordariomycetes;o__Hypocreales;f__Hypocreales_fam_Incertae_sedis;g__Hypocreales_gen_Incertae_sedis;s__Hypocreales_sp;sh__SH1210371.10FU			Hypocreales	7	Saprotroph	Undefined Saprotroph	Microfungus	NULL	Possible	NULL	Sterkenburg E, et al. 2015. New Phytologist 207:1145-1158 ((https://doi.org/10.1111/nph.13426))
