# Supplementary material for: Glacier retreat threatens unique microbial communities and biogeochemical functions confined to glacier surfaces
Source: Research Square preprint supplement (doi:10.21203/rs.3.rs-8090681/v1), 2025-11-25
Supplement: Supplementary file 2 [file 636389f34d2f48a0c399867f.xlsx]

## Sheet: Sheet1
Table S 1. alpha diversity indices of 16S rRNA sequences
Sampling Site	Shannon	Faith pd	Observed Features	Evenness
Site 1	6.89309	34.2659	469	0.776823
Site 2	6.86826	35.2409	495	0.767293
Site 3	7.42194	44.5823	661	0.792222
Site 4	5.77969	12.9376	149	0.800604
Site 5	7.45753	27.0338	397	0.863841
Site 6	8.69508	40.1018	654	0.929642
Site 7	8.31964	44.8192	627	0.895325
Table S 2. alpha diversity indices of ITS 1 region sequences
Sampling Site	Shannon	Faith pd	Observed Features	Evenness
Site 1	2.80133	11.4207	32	0.687935
Site 2	1.96584	12.0454	25	0.648347
Site 3	1.98157	3.57999	5	0.855347
Site 4	2.17713	8.6264	28	0.610063
Site 5	3.12427	12.8806	46	0.855401
Site 6	2.64329	5.85285	13	0.806246
Site 7	2.73801	7.57156	23	0.809062
