# Supplementary material for: Glacier retreat threatens unique microbial communities and biogeochemical functions confined to glacier surfaces
Source: Research Square preprint supplement (doi:10.21203/rs.3.rs-8090681/v1), 2025-11-25
Supplement: Supplementary file 3 [file 9697826eb338bc990782db88.xlsx]

## Sheet: function_table_16S
Table S3	FAPROTAX analyasisi of 16S rRNA gene
	Type	Site 1	Site 2	Site 3	Site 4	Site 5	Site 6	Site 7
1	methanotrophy	0	0	22	97	0	0	0
2	methanogenesis_by_CO2_reduction_with_H2	0	0	6	0	0	0	0
3	hydrogenotrophic_methanogenesis	0	0	6	0	0	0	0
4	methanogenesis	0	0	6	0	0	0	0
5	methanol_oxidation	1233	1698	5286	1844	411	0	0
6	methylotrophy	1233	1698	5308	1941	411	0	0
7	aerobic_ammonia_oxidation	0	0	0	0	0	0	23
8	aerobic_nitrite_oxidation	0	0	0	0	0	115	0
9	nitrification	0	0	0	0	0	115	23
10	nitrate_denitrification	0	0	0	0	35	125	205
11	nitrite_denitrification	0	0	0	0	35	125	205
12	nitrous_oxide_denitrification	0	0	0	0	35	125	205
13	denitrification	0	0	0	0	35	125	205
14	chitinolysis	7	0	1113	1640	462	0	0
15	dark_hydrogen_oxidation	0	0	0	0	35	0	0
16	nitrogen_fixation	120	199	343	0	145	391	99
17	nitrite_respiration	0	0	0	0	35	125	205
18	cellulolysis	361	640	414	0	392	23	0
19	dark_sulfide_oxidation	0	0	68	224	2448	970	0
20	dark_oxidation_of_sulfur_compounds	0	0	68	224	2519	1006	0
21	manganese_oxidation	59	87	65	645	312	351	436
22	fermentation	216	277	2372	988	350	982	270
23	aerobic_chemoheterotrophy	9701	15704	23278	13078	34442	13562	12188
24	human_pathogens_pneumonia	4222	5314	6710	2200	422	1138	696
25	human_pathogens_all	4247	5325	6719	2200	576	1249	696
26	fish_parasites	0	0	56	1104	580	384	224
27	animal_parasites_or_symbionts	4247	5325	6775	3304	1156	1696	920
28	aromatic_compound_degradation	0	0	0	0	1212	443	654
29	hydrocarbon_degradation	0	0	74	696	610	722	1337
30	nitrate_respiration	0	0	57	0	35	188	205
31	nitrate_reduction	0	0	115	0	131	378	504
32	nitrogen_respiration	0	0	57	0	35	188	205
33	intracellular_parasites	115	103	106	0	941	178	505
34	predatory_or_exoparasitic	429	535	1042	201	745	1907	347
35	chloroplasts	1111	1947	2681	395	1630	2754	685
36	cyanobacteria	23299	26826	30447	155	762	502	1436
37	anoxygenic_photoautotrophy_S_oxidizing	0	0	0	0	0	125	205
38	anoxygenic_photoautotrophy	0	0	0	0	0	125	205
39	oxygenic_photoautotrophy	23299	26826	30447	155	762	502	1436
40	photoautotrophy	23299	26826	30447	155	762	627	1641
41	photoheterotrophy	265	408	2322	988	278	408	205
42	phototrophy	23564	27234	32769	1143	1040	910	1641
43	ureolysis	1217	1441	1083	0	1437	1061	26
44	chemoheterotrophy	10987	17538	29892	16659	35843	13858	12458
